# Supplementary material for: Synthesis, characterisation, electrocatalytic HER activity, and electrical resistivity of 3R-NbS2 nanosheets
Source: Royal Society of Chemistry journal article supplement (doi:10.1039/d3nj02171h), 2023-01-01
Supplement: d3nj02171h1.pdf [file d3nj02171h1.pdf]

## Supporting Information

### Synthesis, Characterisation, Electrocatalytic HER Activity, and Electrical Resistivity of 3R-NbS<sub>2</sub> Nanosheets

Pallelappa Chithaiah, Sakil Mallick, Devesh Chandra Binwal, Animesh Bhui and C. N. R. Rao\*

#### 1. EDS spectrum and Mapping of 3R-NbS<sub>2</sub> nanosheets before electrocatalysis

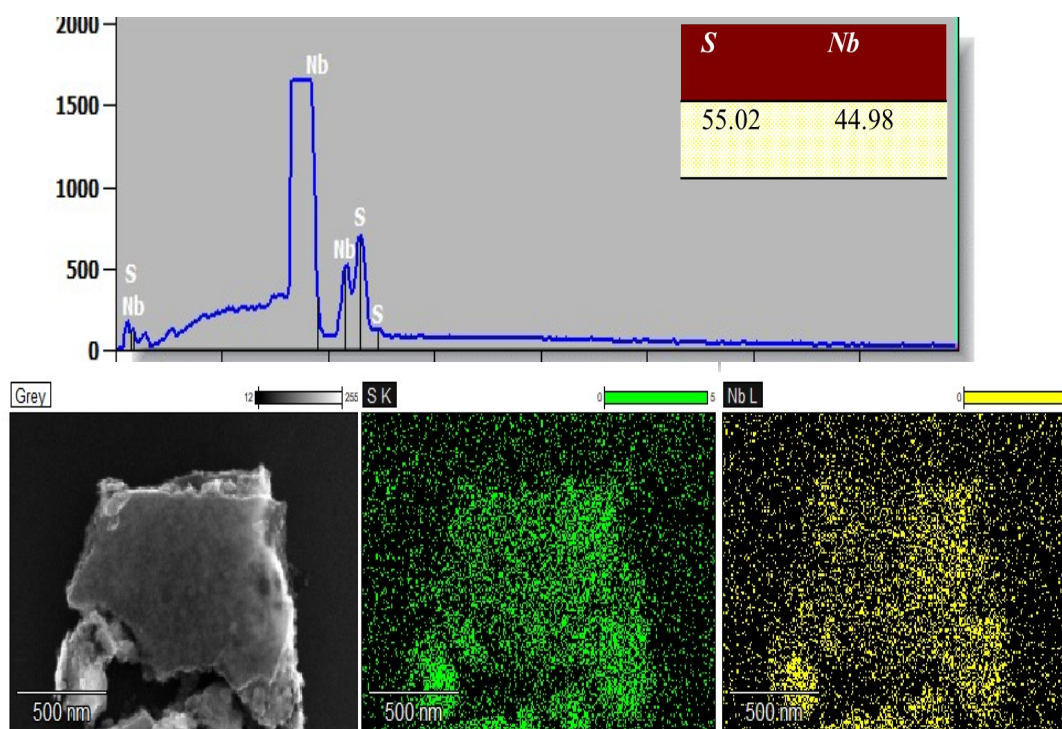

#### 2. SEM image and EDS spectrum of 3R-NbS<sub>2</sub> nanosheets after electrocatalysis

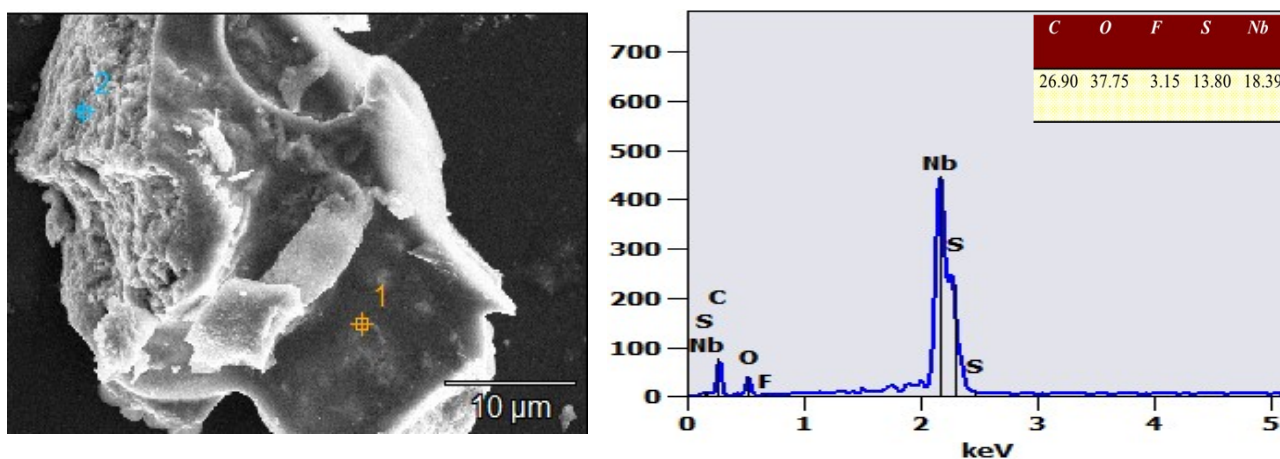

### 3. Low magnification SEM image of 3R-NbS<sub>2</sub> nanosheets

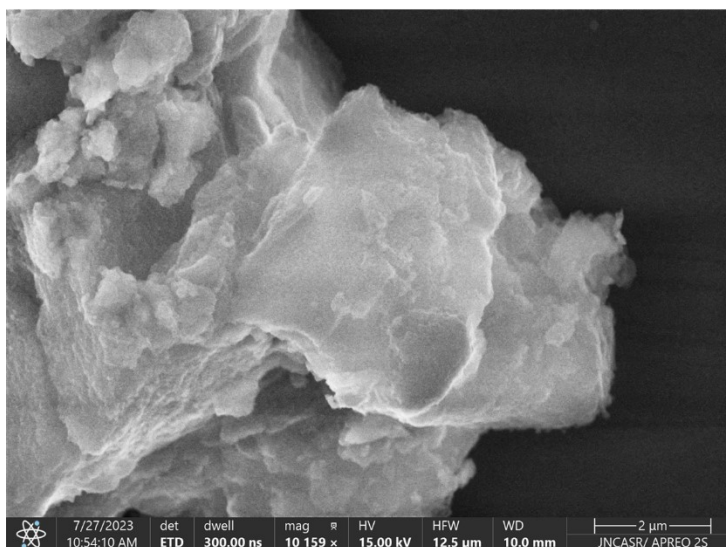

Table S1. Comparison of electrocatalytic HER performance of NbS<sub>2</sub>

| Catalyst              | Current density (J)    | Over potential | Electrolyte                          | References                                       |
|-----------------------|------------------------|----------------|--------------------------------------|--------------------------------------------------|
| Bare NbS <sub>2</sub> | 10 mA cm <sup>-2</sup> | 550 mV         | 0.5 M H <sub>2</sub> SO <sub>4</sub> | Sustainable Energy & Fuels 2018, 2, 96-102       |
| NbS <sub>2</sub> /rGO | 10 mA cm <sup>-2</sup> | 500 mV         | 0.5 M H <sub>2</sub> SO <sub>4</sub> | Sustainable Energy & Fuels 2018, 2, 96-102       |
| 2H-NbS <sub>2</sub>   | 10 mA cm <sup>-2</sup> | 236 mV         | 0.5 M H <sub>2</sub> SO <sub>4</sub> | ACS Appl. Mater. Interfaces 2019, 11, 13205–1321 |
| H-NbS <sub>2</sub>    | 10 mA cm <sup>-2</sup> | 50 mV          | 0.5 M H <sub>2</sub> SO <sub>4</sub> | Nature Energy, 2, 17127 (2017)                   |
| 3R-NbS <sub>2</sub>   | 10 mA cm <sup>-2</sup> | 467 mV         | 0.5 M H <sub>2</sub> SO <sub>4</sub> | This work                                        |
